# Supplementary material for: Inhibition of the Hedgehog Pathway in Advanced Basal-Cell Carcinoma
Source: Atypon-hosted journal article supplement (doi:10.1056/nejmoa0905360), 2009-09-02

## Supplementary Appendix

This appendix has been provided by the authors to give readers additional information about their work.

Supplement to: Van Hoff DD, LoRusso PM, Rudin CM, et al. Inhibition of the hedgehog pathway in advanced basal-cell carcinoma. *N Engl J Med* 2009;361:1164-72. DOI: 10.1056/NEJMoa0905360.

## **Inhibition of the hedgehog pathway in advanced basal-cell carcinoma**

D. D. Von Hoff, M.D.,<sup>1</sup> P. M. LoRusso, D.O.,<sup>2</sup> C.M. Rudin, M.D., Ph.D.,<sup>3</sup> J. C. Reddy, M.D., Ph.D.,<sup>4</sup> R. L. Yauch, Ph.D.,<sup>4</sup> R. Tibes, M.D.,<sup>1</sup> G. J. Weiss, M.D.,<sup>1</sup> M. J. Borad, M.D.,<sup>1</sup> C. L. Hann, M.D., Ph.D.,<sup>3</sup> J. R. Brahmer, M.D.,<sup>3</sup> H. M. Mackey, Ph.D.,<sup>4</sup> B. L. Lum, Pharm.D.,<sup>4</sup> W. C. Darbonne, M.S.,<sup>4</sup> J. C. Marsters Jr., Ph.D.,<sup>4</sup> F. J. de Sauvage, Ph.D.,<sup>4</sup>  
and J. A. Low, M.D., Ph.D.<sup>4</sup>

<sup>1</sup>Translational Genomics Research Institute and Scottsdale Healthcare, Scottsdale, AZ;

<sup>2</sup>Karmanos Cancer Institute, Detroit, MI; <sup>3</sup>Johns Hopkins University, Baltimore, MD;

<sup>4</sup>Genentech, Inc, South San Francisco, CA.

### **SUPPLEMENTARY MATERIAL:**

**Supplementary Table 1**

**Supplementary Table 2**

**Supplementary Table 3**

**Supplementary Figure 1**

**Supplementary Figure 2**

**Supplementary Table 1. Probe and Primer Sequences for Taqman qRT-PCR and PCR Amplification of *PTCH1* and *SMO* exon 9**

| Taqman Primer Probes |                        |                    |                            |
|----------------------|------------------------|--------------------|----------------------------|
| Gene                 | Primer 1               | Primer 2           | Probe                      |
| <i>GLI1</i>          | CAGGGAGGAAAGCAGACTGACT | GGCTTGGCTGTGGCTTCA | FAM-TGCCAGAGGGTGCC-MGB     |
| <i>SMO</i>           | TGAGTGGGAGCGCAGCTT     | GCCCGATGGTCACATTGG | FAM-CGGGACTATGTGCTATGT-MGB |

| Gene Sequencing Primers |                                                           |
|-------------------------|-----------------------------------------------------------|
| Exon                    | Primer Sequence                                           |
| SMO.e9.5i               | TGTAAAACGACGGCCAGTACCCAGTAGACTCAGAAAACCC                  |
| SMO.e9.3i               | CAGGAAACAGCTATGACCAAACCTAAAGATGGGGTCCCA                   |
| SMO.e9.5o               | TGATTGTCTGAGTCTACCCAGTAG                                  |
| SMO.e9.3o               | CCGACAAAACCTAAAGATGGGG                                    |
| PTCH.e2.5i              | TGT AAA ACG ACG GCC AGT AGT CTC GAG GGC GAG TCC GTG T     |
| PTCH.e2.3i              | CAG GAA ACA GCT ATG ACC GCT GGC GAA TAT CTC TAT CAA CC    |
| PTCH.e2.5o              | AGC CCC CCA TGA CGC TCA GAT                               |
| PTCH.e2.3o              | GTG CGC TGG CGA ATA TCT CTA T                             |
| PTCH.e3.5i              | TGT AAA ACG ACG GCC AGT GGC AGG TAG TCA GAT AAC AGA TAA A |
| PTCH.e3.3i              | CAG GAA ACA GCT ATG ACC GGC CTA AAC CAG CAG CCT TCT       |
| PTCH.e3.5o              | TGT ATC CTA TGG CAG GTA GTC AGA T                         |
| PTCH.e3.3o              | ATA ACG GGG CCT AAA CCA GCA GC                            |
| PTCH.e4.5i              | TGT AAA ACG ACG GCC AGT GAC AGA TGC TTA AAA GTG ATC G     |
| PTCH.e4.3i              | CAG GAA ACA GCT ATG ACC GCC ATG CGT TAG GTT AAG GCA       |
| PTCH.e4.5o              | TGC TCG TTT TGA CAG ATG CTT                               |
| PTCH.e4.3o              | GAA GAG GCC ATG CGT TAG GTT A                             |
| PTCH.e5.5i              | TGT AAA ACG ACG GCC AGT GGC AAA AAT TTC TCA GGA ACA CC    |
| PTCH.e5.3i              | CAG GAA ACA GCT ATG ACC CCG ACT ATT CAC TCA AAA AAT GCA C |
| PTCH.e5.5o              | ACA GGT TAC ATG GAT CAG GTA T                             |
| PTCH.e5.3o              | CCC CCG ACT ATT CAC TCA AAA AA                            |
| PTCH.e6.5i              | TGT AAA ACG ACG GCC AGT TGG GCG CAG CCG TGT TAC TTT A     |
| PTCH.e6.3i              | CAG GAA ACA GCT ATG ACC AAG TGA ACG ATG AAT GGA CAC A     |
| PTCH.e6.5o              | ACA AGG TGG ATG CAG TGG GCG                               |
| PTCH.e6.3o              | AGA CAA AGA CGA TCA TGG AGA ATG                           |
| PTCH.e7.5i              | TGT AAA ACG ACG GCC AGT GCC CTT AAT GCA CTG GAT TTT AAC   |
| PTCH.e7.3i              | CAG GAA ACA GCT ATG ACC TCA GGA GGG AAG TGG CTT TTG       |
| PTCH.e7.5o              | CAC ACA AGC CCT TAA TGC ACT G                             |
| PTCH.e7.3o              | CGA TGT CAG GAG GGA AGT GGC                               |
| PTCH.e8.5i              | TGT AAA ACG ACG GCC AGT GGC TGG GGA TTT GAG GCA GTG       |
| PTCH.e8.3i              | CAG GAA ACA GCT ATG ACC CAA GTT CCC AGA ATT GCA ATG T     |
| PTCH.e8.5o              | AGC CAG TGA GTT GGG GGA GCT                               |
| PTCH.e8.3o              | CCA TCA AGT TCC CAG AAT TGC                               |
| PTCH.e9.5i              | TGT AAA ACG ACG GCC AGT CCT GAG ATC TGT GCT GTC GAG       |
| PTCH.e9.3i              | CAG GAA ACA GCT ATG ACC GAG CAG TCA TGG AAA AGT AAA GAC T |
| PTCH.e9.5o              | TGT GTC ACC TGA GAT CTG TGC T                             |
| PTCH.e9.3o              | GCA GGA GCA GTC ATG GAA AAG TAA                           |
| PTCH.e10.5i             | TGT AAA ACG ACG GCC AGT TGG AGG GAA ACA TTA GAA TCA CAA C |
| PTCH.e10.3i             | CAG GAA ACA GCT ATG ACC CCG GTG AGA AGG ACA CAC AGC       |
| PTCH.e10.5o             | AAG TTC TGC CTT TTG ATT TGG G                             |
| PTCH.e10.3o             | CCC TTC CGG TGA GAA GGA CAC                               |
| PTCH.e11.5i             | TGT AAA ACG ACG GCC AGT GCA GAG TCC TAA CTA GCT TTA GAA T |
| PTCH.e11.3i             | CAG GAA ACA GCT ATG ACC TGG GTC AGA CTG AGG AAA ATT AAA G |
| PTCH.e11.5o             | TGC TGG TGG CAG AGT CCT AAC                               |
| PTCH.e11.3o             | TAC TGG GTC AGA CTG AGG AAA AT                            |
| PTCH.e12.5i             | TGT AAA ACG ACG GCC AGT ATC TGC TCA CAC AGT CTG TGC TC    |
| PTCH.e12.3i             | CAG GAA ACA GCT ATG ACC ACC GCA GAC ATG GGA TGC TGG       |
| PTCH.e12.5o             | GCC ACG TAT CTG CTC ACA CAG T                             |
| PTCH.e12.3o             | CAG AGA CCG CAG ACA TGG GAT                               |
| PTCH.e13.5i             | TGT AAA ACG ACG GCC AGT CAT CTT TAT TTT CGA AGC AGT CCT C |
| PTCH.e13.3i             | CAG GAA ACA GCT ATG ACC CAC AGG CTG AAA GAG TTC TCT CA    |
| PTCH.e13.5o             | CAA ATG CTT CAA GAG GAA AGG G                             |
| PTCH.e13.3o             | ATA AGT CCA CAG GCT GAA AGA GTT C                         |
| PTCH.e14.5i             | TGT AAA ACG ACG GCC AGT CAC AGT GAA AAA TGG CAG AAT G     |
| PTCH.e14.5o             | TCT CCG TAC ACA GTG AAA AAT GG                            |
| PTCH.e14.3i             | CAG GAA ACA GCT ATG ACC AAG CAA TCT GAT GAA CTC CAA AGG   |
| PTCH.e14.3o             | AAG TAG AAG CAA TCT GAT GAA CTC C                         |
| PTCH.e15.5i             | TGT AAA ACG ACG GCC AGT CAA GGT ATT AAC TAG ACA GCT TCT C |
| PTCH.e15.3i             | CAG GAA ACA GCT ATG ACC CAT GAC AAA GGA ACC TGT TGA A     |
| PTCH.e15.5o             | AAT CAG TTT AAG TGT GGT GGT G                             |
| PTCH.e15.3o             | GCT CTC ATA ATC ATG ACA AAG GAA C                         |
| PTCH.e16.5i             | TGT AAA ACG ACG GCC AGT ACG TCT AAG AGC CCC CTG CCC T     |
| PTCH.e16.3i             | CAG GAA ACA GCT ATG ACC TGT CAA GCA GCC TCC ACC AGG       |
| PTCH.e16.5o             | TGA TGG ACG TCT AAG AGC CCC                               |
| PTCH.e16.3o             | CAC GCT GTC AAG CAG CCT CCA                               |
| PTCH.e17.5i             | TGT AAA ACG ACG GCC AGT TCT GTG CTC TCA AGG CAG AAG T     |
| PTCH.e17.3i             | CAG GAA ACA GCT ATG ACC TGT TGC TGA GTT TGG AGA ACC A     |
| PTCH.e17.5o             | TCA GCT TCT GTG CTC TCA AGG                               |

**Supplementary Table 2.** Listing of Grade 2 Adverse Events by MedDRA Preferred Terms

| <b>Adverse Event</b>              | <b>Grade 2</b> |
|-----------------------------------|----------------|
| Muscle Spasms                     | 4              |
| Anorexia                          | 3              |
| Dyspnea                           | 3              |
| Chest Pain                        | 2              |
| Cough                             | 2              |
| Dysgeusia                         | 2              |
| Erythema                          | 2              |
| Musculoskeletal Chest Pain        | 2              |
| Upper Respiratory Tract Infection | 2              |
| Weight Decreased                  | 2              |
| Anemia                            | 1              |
| Anxiety                           | 1              |
| Asthenia                          | 1              |
| Back Pain                         | 1              |
| Bowen's Disease                   | 1              |
| Bronchitis                        | 1              |
| Candidiasis                       | 1              |
| Cheilitis                         | 1              |
| Constipation                      | 1              |
| Cranial Nerve Pareses             | 1              |
| Cystitis                          | 1              |
| Decubitis Ulcer                   | 1              |
| Diarrhea                          | 1              |
| Duodenal Ulcer                    | 1              |
| Dyspepsia                         | 1              |
| Dysphagia                         | 1              |
| Dysuria                           | 1              |
| Eye Infection                     | 1              |
| Facial Palsy                      | 1              |
| Fatigue                           | 1              |
| Flank Pain                        | 1              |
| Gout                              | 1              |
| Headache                          | 1              |

|                              |   |
|------------------------------|---|
| Hemorrhage                   | 1 |
| Humerus Fracture             | 1 |
| Hydrothorax                  | 1 |
| Hyperglycemia                | 1 |
| Hyperhidrosis                | 1 |
| Hypertension                 | 1 |
| Hypocalcemia                 | 1 |
| Influenza                    | 1 |
| Insomnia                     | 1 |
| Jaw Pain                     | 1 |
| Limb Abscess                 | 1 |
| Lobar Pneumonia              | 1 |
| Localized Infection          | 1 |
| Lymphopenia                  | 1 |
| Nausea                       | 1 |
| Neck Pain                    | 1 |
| Neuralgia                    | 1 |
| Oesophageal Stenosis         | 1 |
| Oral Pain                    | 1 |
| Pain in Extremity            | 1 |
| Photophobia                  | 1 |
| Pleural Effusion             | 1 |
| Pleurisy                     | 1 |
| Pneumonia                    | 1 |
| Respiratory Tract Congestion | 1 |
| Sinusitis                    | 1 |
| Skin Infection               | 1 |
| Supraventricular Tachycardia | 1 |
| Upper Abdominal Pain         | 1 |
| Vomiting                     | 1 |
| Wound Infection              | 1 |

**Supplementary Table 3.** *PTCH1* and/or *SMO* mutations identified in tumor tissue from 9 out of 10 patients with BCC.<sup>a</sup>

| Patient ID | GDC-0449 Phase I Disease Group | Mutation                  |                          | Mutation present in patient-matched normal tissue? |
|------------|--------------------------------|---------------------------|--------------------------|----------------------------------------------------|
|            |                                | nucleic acid              | amino acid               |                                                    |
| 1          | LA                             | <i>PTCH1</i> _901G>A      | <i>PTCH1</i> _238G>E     | No                                                 |
|            |                                | <i>PTCH1</i> _2118C>T     | <i>PTCH1</i> _644P>S     | No                                                 |
|            |                                | <i>PTCH1</i> _2236C>T     | <i>PTCH1</i> _683S>F     | No                                                 |
|            |                                | <i>PTCH1</i> _3780C>T     | <i>PTCH1</i> _1198P>S    | No                                                 |
| 2          | MET                            | <i>PTCH1</i> _2749-1G>A   | intronic_splice site     | na                                                 |
| 4          | LA                             | <i>PTCH1</i> _3465G>A     | <i>PTCH1</i> _1093G>R    | Yes                                                |
|            |                                | <i>PTCH1</i> _3771A>T     | <i>PTCH1</i> _1195T>S    | Yes                                                |
| 5          | MET                            | <i>PTCH1</i> _465T>TA     | <i>PTCH1</i> _Y93>stop   | na                                                 |
| 9          | MET                            | <i>PTCH1</i> _450-462_del | <i>PTCH1</i> _fs>112stop | na                                                 |
| 11         | LA                             | nd                        | nd                       |                                                    |
| 14         | MET                            | <i>SMO</i> _1884G>T       | <i>SMO</i> _W535L        | No                                                 |
|            |                                | <i>PTCH1</i> _1891C>T     | <i>PTCH1</i> _568P>L     | No                                                 |
|            |                                | <i>PTCH1</i> _2254C>T     | <i>PTCH1</i> _689P>L     | No                                                 |
| 17         | MET                            | <i>PTCH1</i> _895G>A      | <i>PTCH1</i> _236W>stop  | na                                                 |
| 23         | MET                            | <i>PTCH1</i> _2776G>A     | <i>PTCH1</i> _863W>stop  | na                                                 |
| 27         | MET                            | <i>PTCH1</i> _3000C>T     | <i>PTCH1</i> _938Q>stop  | na                                                 |

LA = locally-advanced, MET = metastatic, na = not available, nd = not detected

<sup>a</sup> When available, patient-matched normal skin was also sequenced to determine if the identified mutation was somatic or germline.

**Supplementary Figure 1. GDC-0449 Activity in Other Patients with Advanced BCC**

A. 49 year old male with locally advanced BCC shown with multiple large lesions on upper right back at baseline and at the onset of a clinical partial response after 3 months of GDC-0449 administration (Patient 7)

B. 67 year old male with BCC metastatic to lung, soft tissue and bone, with PET and CT (coronal view) scans at baseline and at 8 months, at time of confirmed radiologic partial response (Patient 2)

C. 83 year old male with BCC in the right external ear and invasion into the parotid gland, shown with PET/CT scans at baseline and at the onset of a clinical partial response after 2 months of GDC-0449 administration (Patient 11)

Supplementary Figure 1. GDC-0449 Activity in Other Patients with Advanced BCC

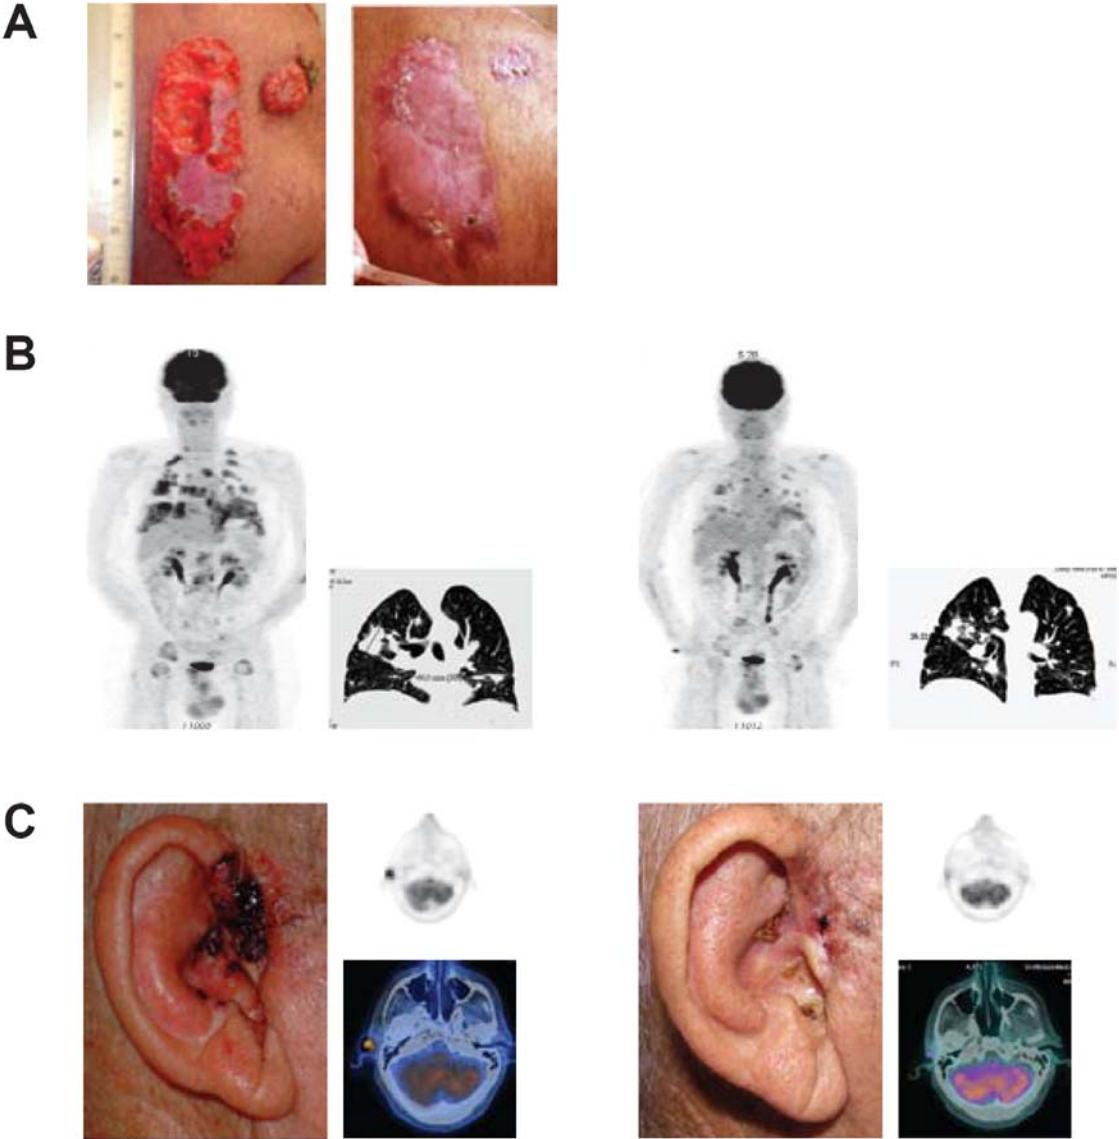

**Supplementary Figure 2.** Identification of a Homozygous, Intronic *PTCH1* Mutation in a Lung Biopsy from Patient 2

A. Nucleotide sequence tracing shows a homozygous intronic mutation (-1G>A) in a dinucleotide splice site consensus sequence of *PTCH1* in an archival lung tumor specimen obtained from Patient 2. This mutation maps to the splice site junction of an exon mapping to the 2<sup>nd</sup> extracellular loop of PTCH1.

B. MassARRAY assays of gDNA isolated from either whole tissue (top) or laser capture micro-dissected (bottom) tumor epithelium are shown. Note the absence of the wild-type G allele in the lower panel.

**Supplementary Figure 2.** Identification of a PTCH1 Homozygous Intronic Mutation in an Archival Patient Lung Tumor Specimen

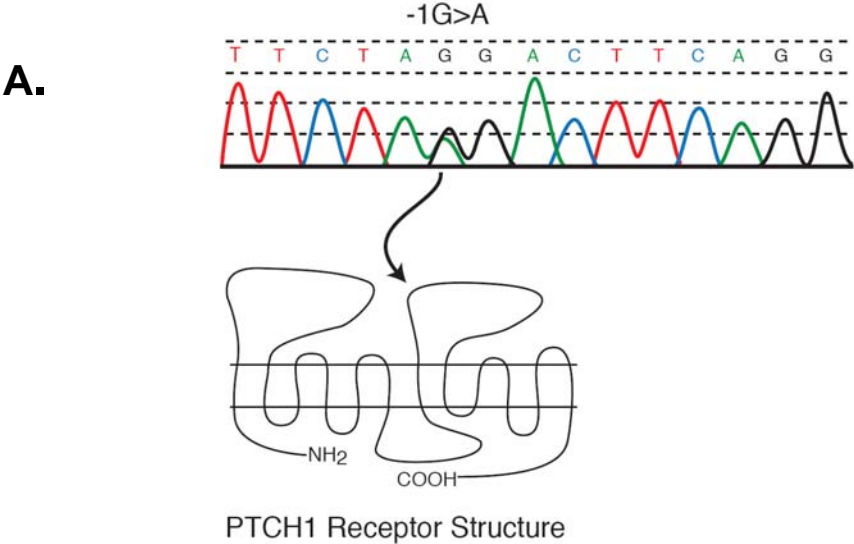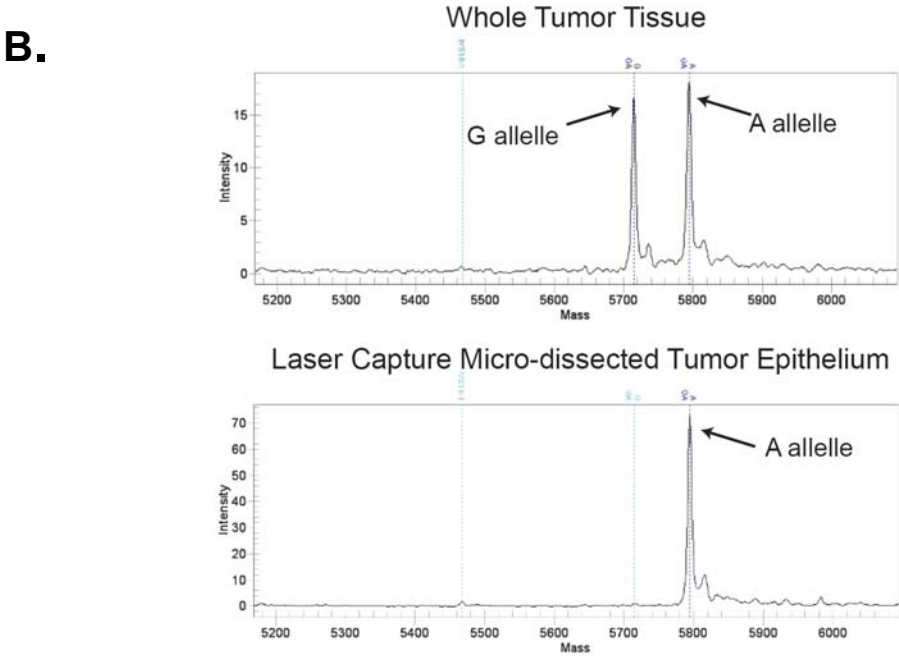

Supplement: nejm_von_hoff_1164sa1.pdf [file nejm_von_hoff_1164sa1.pdf]
